# Supplementary material for: A Toolkit for Implementation of Clinical Genomic Testing: Using a Combined Stakeholder and Evidence-Driven Approach
Source: Research Square preprint supplement (doi:10.21203/rs.3.rs-842219/v1), 2021-08-31
Supplement: Supplementary file 1 [file 327fe81ab9f1db1684c8e318.xlsx]

## Sheet: Sheet1
	Overarching TDF theme		Distinct barrier (^ = same barrier label but TDF constructs or TDF domain and constructs different)	Distinct barrier TDF domain	Domain labels and numbers	Distinct barrier TDF theoretical construct	Construct labels and numbers	Enablers	Retrospective BCT2	BCT labels and numbers		Intuition and theory alignment2 - distinct barrier only	Non-links	inconclusive	No evidence	Intuition and theory alignment2 - overarching and distinct	Non-links	inconclusive	No evidence	theory-driven approach	Theory informed enabling strategy *underline = not matched with domain	BCT labels and numbers	number of intervention strategies	Theorised links (# = distinct barrier TDF domain is key driver and overarching TDF domain changes as a result; * = overarching is the key driver and the distinct barrier TDF domain changes as a result; blank = distinct and overarching TDF domain codes are the same)
TBA1	7 overriding TDF domains (5 in total, with some used between 1-2 times)	Bcon = 1 Bcap = 2 SocInf = 1 Know = 1 Skills = 2	20 lay-person barriers	20 TDF domains (6 used between 1-6 times)	Goals = 1 Enviro = 4 Mem, atten, dec = 3 Skills = 6 Know = 4 Prof ID = 2	20 constructs (13 in total, with some used between 1-3 times)	Goal priority = 1 Personxenviro int = 1 Memory, decision ma = 1 Resources/material res = 3 Skill dev = 3 Compe = 3 Proc know = 2 Knowl = 1 Know task enviro = 1 Decision mak = 1 Practice = 1 Prof confidence = 1 Prof role = 1	20-	31 BCTs used (14, with some used between 1-6 times)	Salience of consequences = 1 Social support prac = 6 Demo of behav = 1 Problem solving = 1 Behavioural prac/rehear = 2 Habit form = 2 Graded task = 1 Cons mental res = 6 Prompts and cues = 1 Cred source = 5 Feedback on behav = 2 Self-mon of behav = 1 Self-mon outcomes behav = 1 Feedback on outcomes of behav = 1	TBA1	5/31 = align with theory (16%)	4/31 = non-links (13%)	5/31 = inconclusive (16%)	17/31 = no evidence (55%)	10/31 = align with individual or overarching TDF domain (32%)	4/31 = non-links (13%)	5/31 = inconclusive (16%)	12/31 = no evidence (39%)		15 BCTs (11 used between 1-3 times) used to develop theory driven strategies across 4 distinct barriers	Prompts and cues = 1 Adding objects to enviro = 3 Social supp (prac) = 1 Instruction on how to perform behav = 2 Problem solving = 1 Conserving mental resources = 2 Infor about health consequences = 1 Info about social and enviro consequences = 1 Demonstration on how to perform the behaviour = 1 Behavioural practice/rehearsal = 1 Feedback on behaviour = 1	9 theory driven intervention strategies to address 4 distinct barriers	#=9, *=0, blank=0
TBA2	4 overarching TDF domains (3 used in total with one used twice)	Prof ID = 1 Intention = 2 Soc inf = 1	7 lay-person identified	7 TDF domains in total (5 used in total with some used between 1-3 times)	Knowledge = 3 Prof role/ID = 2 Soc inf = 1 Enviro = 1	7 constructs (6 in total with one used twice)	Knowledge = 2 Procedural knowl = 1 Prof role = 1 Prof boundaries = 1 Persxenviro int = 1	4-	12 BCTs (7 used between 1-2 times)	Social comp = 2 Info soc and envi conseq = 1 Prob solve = 2 Info other approv = 2 Monitoring outcomes of behav without FB = 2 Feedback on outcomes of behav = 2 Social supp unspec = 1	TBA2	2/12 = align with theory (17%)	2/12= non-links (17%)	1/12 = inconclusive (8%)	7/12 = no evidence (58%)	4/12 = align with individual or overarching TDF domain (33%)	4/12 = non-links (33%)	2/12 = inconclusive (16%)	2/12 = no evidence (17%)		7 BCTs (none used more than once)	Instruction on how to perform the behaviour = 1 Social comparison = 1 Incentive (outcome) = 1 Goal setting (behaviour) = 1 Restrucuring the physical enviro = 1 Social support (practical) = 1 Restructuring the social environment = 1	7 theory driven strategies to tackle 3 distinct barriers	#=4. *=3, blank=0
TBA3	2 overriding TDF themes	Bcap = 1 Emot = 1	5 lay-person barriers	5 TDF domains (none used multiple times)	Enviro = 1 Mem, atten, dec = 1 Knowl = 1 Soc inf = 1	5 constructs (none used more than once)	Org culture/climate = 1 Decision making = 1 Knowledge = 1 Social supp = 1 Persxenviro int = 1	6-	6 BCTs (five with one used twice)	Restructuring the physical environment = 2 Conserving mental resources = 1 Behavioural practice/ rehearsal = 1 Action planning = 1 Social support (unspecified) = 1	TBA3	2/6 = align with theory (33%)	1/6 = non-links (16%)	0/6 = inconclusive (0%)	3/6 = no evidence (50%)	2/6 = align with individual or overarching TDF domain (33%)	1/6 - non-links (13%)	0/6 = inconclusive (0%)	3/6 = no evidence (50%)		8 BCTs (6 used with two used twice)	Restructure the physical environment = 2 Remove aversive stimulus = 2 Problem solving = 1 Verbal pursuasion about capability = 1 Social support (practical) = 1 Adding objects to the environment = 1	4 theory driven strategies to address two distinct barriers	#=4; *=0; blank=0
TOTALS	13 (8 used between 1-3 times)	Bcon = 1 Bcap = 3 SocInf = 2 Know = 1 Skills = 2 Prof ID = 1 Intent = 2 Emot = 1	32 lay-person barriers	32 (7 used between 1-6 times)	Goals = 1 Enviro = 6 Mem, atten, dec = 4 Skills = 6 Know = 8 Prof ID = 4 Soc inf = 2	32 (18 used between 1-4 times)	Goal priority = 1 Personxenviro int = 3 Memory, decision ma = 1 Resources/material res = 3 Skill dev = 3 Compe = 3 Proc know = 2 Knowl = 4 Know task enviro = 1 Decision mak = 1 Practice = 1 Prof confidence = 1 Prof role = 2 Procedural knowl = 1 Prof boundaries = 1 Org culture/climate = 1 Decision making = 1 Social supp = 1	-30	49 (with 21 used between 1-7 times)	Salience of consequences = 1 Social support prac = 6 Demo of behav = 3 Problem solving = 1 Behavioural prac/rehear = 3 Habit form = 2 Graded task = 1 Cons mental res = 7 Prompts and cues = 1 Cred source = 5 Feedback on behav = 2 Self-mon of behav = 1 Self-mon outcomes behav = 1 Feedback on outcomes of behav = 3 Social comp = 2 Info soc and envi conseq = 1 Info other approv = 2 Monitoring outcomes…	Total	9/49= align with individual TDF domain (18%)	7/49 = non-links (14%)	6/49 = inconclusive (12%)	27/49 = no evidence (55%)	16/49 = align with individual or overarching TDF domain (33%)	9/49 = non-links (18%)	7/49= inconclusive (14%)	17/49 = no evidence (35%)		30 BCTs (20 used between 1-4 times)	Prompts and cues = 1 Adding objects to enviro = 4 Social supp (prac) = 3 Instruction on how to perform behav = 3 Problem solving = 2 Conserving mental resources = 2 Infor about health consequences = 1 Info about social and enviro consequences = 1 Demonstration on how to perform the behaviour = 1 Behavioural practice/rehearsal = 1 Feedback on behaviour = 1 Instruction on how to perform the behavio…	20 theory driven strategies to address 9 distinct barriers	# = 17; *=3; blank=0
